# Supplementary material for: Stigma and self-disclosure in interpersonal relationships of registered sex offenders
Source: eLife journal article supplement (doi:10.7554/elife.75433), 2005-01-01
Supplement: supp [file Figure_4-5- source data.xlsx]

## Sheet: D614 occupancies
From CoV-2_S_Manuscript_elife-revision (on date 2022-02-11)
AVERAGE OCCUPANCY IN EACH STATE
	Condition	"State 2"		"State 3"		Change in Up position:
		Low FRET		High FRET		Substrac Up-conformation values
		"Up - Conformation"		"Down - Conformation"		from Unbound condition
		(%)		(%)		(%)
		Average	error	Average	error	Average	Error
	Unbound	40	3	60	3
	ACE2	66	3	34	3	26	4.24264
	362IgG1	52	2	48	2	12	3.60555
	362IgA1	54	2	46	2	14	3.60555
	REGN10987	52	3	48	3	12	4.24264
	S309	49	3	51	3	9	4.24264
	CR3022	54	4	46	4	14	5
	4A8	48	2	52	2	8	3.60555
	1A9	60	2	40	2	20	3.60555
	2G12	59	2	41	2	19	3.60555

## Sheet: G614 occupancies
From CoV-2_S_Manuscript_elife-revision (on date 2022-02-11)
AVERAGE OCCUPANCY IN EACH STATE
	Condition	"State 2"		"State 3"		Change in Up position:
		Low FRET		High FRET		Substrac Up-conformation values
		"Up - Conformation"		"Down - Conformation"		from Unbound condition
		(%)		(%)		(%)
		Average	error	Average	error	Average	error
	Unbound	59	3	41	3	---	---
	ACE2	69	4	31	4	10	5
	362IgG	58	2	42	2	-1	3.60555
	362IgA1	63	2	37	2	4	3.60555
	REGN10987	63	4	37	4	4	5
	S309	54	3	46	3	-5	4.24264
	CR3022	65	4	35	4	6	5
	4A8	57	3	43	3	-2	4.24264
	1A9	66	3	34	3	7	4.24264
	2G12	69	3	31	3	10	4.24264

## Sheet: D614 kinetics
From CoV-2_S_Manuscript_elife-revision (on date 2022-02-11)
	D614
	Condition	k down		k up
		Average	error	Aveg	error
	Unbound	3.8	0.2	2.6	0.2
	ACE2	1.3	0.1	2.2	0.2
	362IgG1	2.2	0.1	2.2	0.1
	362IgA1	1.8	0.1	2	0.1
	REGN10987	2.4	0.2	2.2	0.2
	S309	2.3	0.1	2.1	0.1
	CR3022	2.3	0.2	3.1	0.2
	4A8	2.3	0.1	2.3	0.1
	1A9	2.2	0.1	3.4	0.2
	2G12	2.5	0.1	3.4	0.2

## Sheet: G614 kinetics
From CoV-2_S_Manuscript_elife-revision (on date 2022-02-11)
	G614
	Condition	k down		k up
		Average	error	Aveg	error
	Unbound	1.6	0.2	2	0.2
	ACE2	0.7	0.1	2	0.4
	362IgG1	2	0.1	2.6	0.1
	362IgA1	1.6	0.1	2.6	0.1
	REGN10987	2	0.2	3.7	0.3
	S309	2.2	0.1	2.4	0.2
	CR3022	1.1	0.2	1.8	0.2
	4A8	2	0.2	2.3	0.2
	1A9	1.7	0.1	3.2	0.2
	2G12	1.4	0.1	2.7	0.3
