# Supplementary figures and images for: Stigma and self-disclosure in interpersonal relationships of registered sex offenders
Source: eLife journal article supplement (doi:10.7554/elife.75433), 2005-01-01

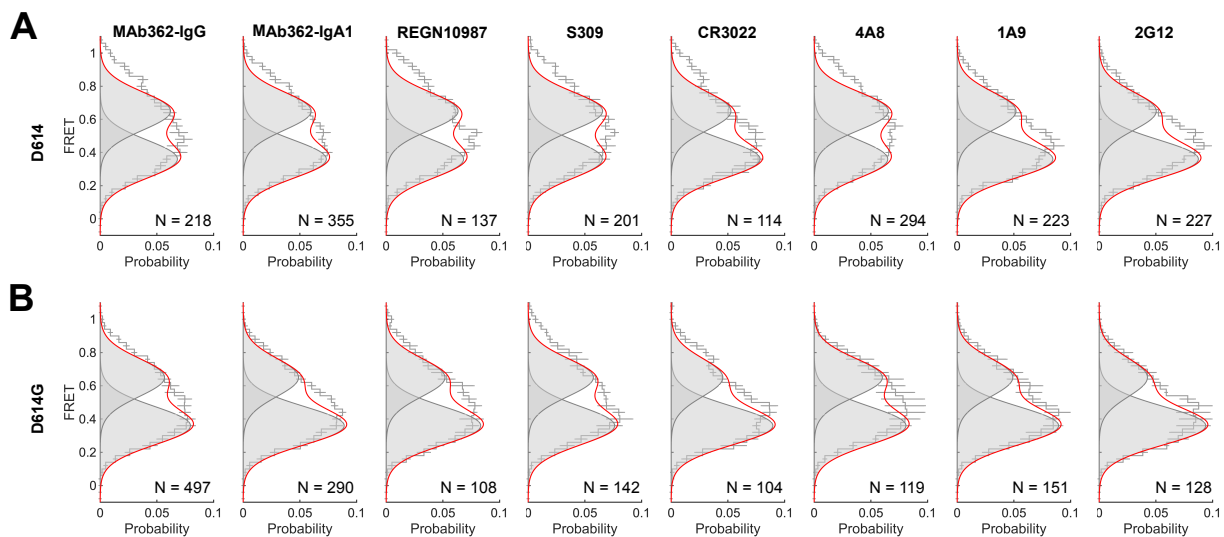

Supplement: supp [file elife-75433-supp-v1.zip]
